3 **Microbial Biomarkers of Intestinal Barrier Maturation in Preterm Infants**

4

5 Bing Ma<sup>1,\*</sup>, Elias McComb<sup>1</sup>, Pawel Gajer<sup>1</sup>, Hongqiu Yang<sup>1</sup>, Mike Humphrys<sup>1</sup>, Adora C.

6 Okogbule-Wonodi<sup>3</sup>, Alessio Fasano<sup>4</sup>, Jacques Ravel<sup>1</sup>, and Rose M Viscardi<sup>2</sup>

7

8 <sup>1</sup>Institute of Genome Sciences, Department of Microbiology and Immunology, University  
9 of Maryland School of Medicine, Baltimore, MD 21201, United States; <sup>2</sup>Department of  
10 Pediatrics, University of Maryland School of Medicine, Baltimore, MD 21201, United  
11 States; <sup>3</sup>Howard University College of Medicine, Department of Pediatrics & Child  
12 Health, Washington, DC 20060; <sup>4</sup>MassGeneral Hospital for Children, Center for Celiac  
13 Research and Treatment, Mucosal Immunology and Biology Research Center,  
14 Massachusetts General Hospital, Boston, MA 02114.

15

16 \* corresponding author

17 Bing Ma: [bma@som.umaryland.edu](mailto:bma@som.umaryland.edu)

18

19 **ABSTRACT**

20 Intestinal barrier immaturity, or "leaky gut," is the proximate cause of susceptibility to  
21 necrotizing enterocolitis in preterm neonates. However, the impact of intestinal  
22 microbiota development on intestinal mucosal barrier maturation has not been  
23 evaluated in this population. In this study, we investigated a longitudinally sampled  
24 cohort of 38 preterm infants monitored for intestinal permeability (IP) and fecal  
25 microbiota during the first two weeks of life. Rapid decrease in IP indicating intestinal  
26 barrier function maturation correlated with significant increase in community diversity. In  
27 particular, members of the *Clostridiales* and *Bifidobacterium* were highly  
28 transcriptionally active, and progressively increasing abundance in *Clostridiales* was  
29 significantly associated with decreased gut permeability. Further, neonatal factors  
30 previously identified to promote intestinal barrier maturation, including early exclusive  
31 breastmilk feeding and low antibiotic exposure, favor the early colonization of the gut  
32 microbiota by members of the *Clostridiales*, which altogether are associated with  
33 improved intestinal barrier function in preterm infants.

## 34 **Introduction**

35 The intestinal mucosa paracellular trafficking of macromolecules is controlled by a  
36 competent epithelial barrier <sup>1</sup>. The intestinal barrier constitutes a protective shield to the  
37 diffusion of pathogens and other elements with pro-inflammatory and tissue injury  
38 properties, and regulates absorption and secretion of essential nutrients <sup>2</sup>. A functional  
39 intestinal barrier is driven by a complex structure that includes physical barrier with  
40 coinciding chemical, immunological and microbiological components <sup>3</sup>. The colonization  
41 with microorganisms starts at birth and undergoes rapid shifts in composition and  
42 structure as the host matures over time <sup>4</sup>. These microorganisms perform essential  
43 functions mechanistically linked to intestinal barrier competency, including epithelial  
44 metabolism, proliferation and survival, mucin and antimicrobial compound production,  
45 and cell-cell communication signaling molecule secretion <sup>3</sup>. The microbial community in  
46 general is considered to play critical roles in the early development of the intestinal  
47 epithelium, the immune system, nutrient acquisition and energy regulation, and  
48 opportunistic pathogens suppression <sup>3,5</sup>.

49  
50 Disrupting intestinal microbiota, on the other hand, leads to dysbiosis, a state of  
51 ecological imbalance where the community loses diversity, key bacterial species, and  
52 more critically metabolic capacity with reduced colonization resistance to opportunistic  
53 pathogens <sup>6</sup>. Early life gut dysbiosis is associated with disease susceptibility along with  
54 short-term and lifelong health issues, such as necrotizing enterocolitis (NEC) <sup>7</sup>, sepsis <sup>7</sup>,  
55 asthma and allergies <sup>8</sup>, type 1 diabetes <sup>9</sup>, celiac disease <sup>10</sup>, inflammatory bowel disease  
56 <sup>11</sup> and obesity <sup>12</sup>, among others. NEC is a life-threatening, gastrointestinal emergency

57 affecting approximately 7-10% of preterm neonates with mortality as high as 30-50%<sup>13</sup>.  
58 In this condition, bacteria cross the intestinal wall leading to local and systemic  
59 infection and inflammation, and bowel wall necrosis and perforation. Intestinal barrier  
60 immaturity, characterized as elevated intestinal permeability (IP), or “leaky gut”, is the  
61 proximate cause of susceptibility to NEC in preterm neonates<sup>14,15</sup>. It is critical to  
62 characterize the preterm infant intestinal microbiota to identify dysbiotic states  
63 associated with increased intestinal leakiness, as well as beneficial bacteria associated  
64 with improved intestinal barrier function, for subsequent stratification of early diagnosis,  
65 early intervention and primary prevention of leaky gut and its sequelae.

66  
67 Despite the critical role of the microbial community in intestinal barrier function, its effect  
68 on newborn IP is unknown. In particular, the microbiota of preterm neonates with  
69 measured elevated IP, a high-risk population for NEC, has not been studied previously.  
70 We hypothesize that the intestinal microbiota plays a pivotal role in modulating IP and  
71 that the presence of “beneficial” bacteria will be associated with improved intestinal  
72 barrier function in preterm infants. In this study, we studied a cohort of 38 preterm  
73 infants born prior to 33 weeks of gestation. IP was measured by urinary detection of  
74 orally administered sugar probes lactulose and rhamnose using high pressure liquid  
75 chromatography<sup>16</sup> with coinciding measures of the composition and function of the fecal  
76 microbial communities were investigated. We sampled three time points, study day 1, 8,  
77 and 15, during the first two weeks of life, which is a critical period corresponding to the  
78 initiation of the intestinal microbiota development process<sup>16-18</sup>. A rapid decrease in IP  
79 was observed to correlate with increased fecal microbiota biodiversity, indicating

80 intestinal barrier function maturation over the first two weeks of life with a shift in the  
81 composition and structure in intestinal microbial community. We subsequently revealed  
82 an association between decreased IP and the abundance of *Clostridiales*, which was  
83 highly transcriptionally active along with members of the *Bifidobacterium*. Our study  
84 highlights the multifactorial processes involved in intestinal barrier maturation, and the  
85 importance to consider microbiological and neonatal factors for diagnosing, monitoring,  
86 and modulating IP in preterm infants.

## 87 **Results**

88 Intestinal barrier maturation correlates with increased microbiota biodiversity over the  
89 first two weeks of life.

90 The demographic, obstetric, and neonatal characteristics for all thirty-eight preterm  
91 infants enrolled in the study are summarized in **Table 1**. As previously reported<sup>16</sup>, 20  
92 infants (57%) experienced a rapid decrease in intestinal permeability (IP), 5 infants  
93 (14%) had a decreased IP during the first week and subsequent substantial increase  
94 and 10 infants (29%) showed a delayed IP decrease maintaining high IP throughout the  
95 study period. At each time point, infants were assigned to either high or low IP  
96 (**Supplemental File 3**). The microbiota of 64 fecal samples were successfully  
97 characterized by high-throughput sequencing of the V3-V4 variable regions of 16S  
98 rRNA genes. A total of 422,444 high-quality amplicon sequences was obtained,  
99 corresponding to 10,544 ( $\pm 4,029$ ) sequences per sample with an average length of 428  
100 bp. The top 25 most abundant phylotypes are shown in **Supplemental Figure 1A**.  
101 Taxonomic profiles of all samples were clustered into three distinct groups according to  
102 similarities in community composition and structure. *Klebsiella* spp., *Staphylococcus*  
103 *epidermidis*, and *E. coli* dominated cluster I, II, and III, respectively. Both La/Rh ratio  
104 and taxonomic profile of each sample are shown in **Supplemental File 3**. Taxonomic  
105 profiling of corresponding metagenomes further resolved *Klebsiella* spp. to *Klebsiella*  
106 *pneumoniae*. Not surprisingly, older term infants at 6-24 months old, or phase II/III as  
107 defined previously<sup>17-19</sup>, clustered together in a different and more diverse cluster  
108 (**Supplemental Figure 1B**). Rapid decrease in IP over the two-week observation period  
109 indicates intestinal barrier function maturation ( $p$ -value = 0.002), which is correlated with

110 a significant increase in community diversity (p-value = 0.02) (**Figure 1A**); while delayed  
111 increase in community diversity was associated with maintenance of high intestinal  
112 permeability (p-value < 0.001) (**Figure 1B**). The results indicated that preterm infant  
113 intestinal barrier maturation correlates with increased fecal microbiota biodiversity and a  
114 change in microbiota structure.

115

116 Subject variation, PMA and IP explain most of the variation in microbial community  
117 composition

118 We employed multivariate response linear regression on the “balance” of microbial  
119 community and evaluated the effect of covariates of demographic, obstetric, and  
120 neonatal factors on the microbiome using Gneiss<sup>20</sup>. Covariates of antibiotics use,  
121 maternal antibiotics use, delivery mode, PPRM, feeding pattern, IP, birthweight,  
122 gender, ethnicity, gestational age (GA) and postmenstrual age (PMA) were included in  
123 the analysis. Subject, PMA, and IP had the greatest correlation with intestinal microbiota,  
124 together they explained 63.4% of the variation of the intestinal microbial community  
125 composition observed in the cohort (**Supplemental File 4**). The plots (**Supplemental**  
126 **Figure 2**) show the predicted points lie within the same region as the original  
127 communities and the residuals have roughly the same variance as the predictions within  
128  $\pm 2$ . Overall our result indicates the microbial differences between subjects are large (R  
129 squared difference is  $0.23 \pm 0.10$ ), and the covariate with strongest effect is PMA (R  
130 squared difference is 0.44). IP correlates with the intestinal microbiota (R squared  
131 difference is 0.20), and its effect is lower than PMA and similar to the average among-  
132 subject difference.

133 *Clostridiales* is associated with low intestinal permeability in preterm infants

134 Comparative analysis of fecal microbiota with high and low IP showed that *Clostridia*,  
135 the class containing the order *Clostridiales* in this cohort, was significantly more  
136 abundant in samples with low IP compared to those with high IP (p-value = 0.01)  
137 (**Figure 2, Supplemental Figure 3**). In particular, a progressive and significant increase  
138 in members of *Clostridiales* over the first two week after birth significantly associated  
139 with low IP (p-value = 0.0002) (**Figure 3**). Based on Bayesian nonparametric adaptive  
140 smoothing models and subject-specific changes in relative abundance of *Clostridiales* at  
141 each of study day 1, 8, and 15, the results demonstrated: (1) at baseline study day 1,  
142 the abundance of *Clostridiales* was low in subjects with either high or low IP; (2)  
143 However, in samples measures with low IP but not high IP, a significant increase in  
144 *Clostridiales* was observed that reached ~8% median and >20% maximal relative  
145 abundance from study day 1 to day 8, and ~16% median and ~45% maximal relative  
146 abundance again from study day 8 to 15; (3) on the other hand, in samples measured in  
147 high IP at study day 1 that are also high at the follow up days, members of *Clostridiales*  
148 was almost completely absent on study day 8 and no increase was observed from study  
149 day 1 to 8, and the increase from study 8 to 15 was small at ~3% median and ~10%  
150 maximal relative abundance; (4) in infants 6-24 months old, *Clostridiales* is the most  
151 abundant taxonomic groups with >50% median and >85% maximal relative abundance  
152 (**Supplemental Figure 4**). Together, our results suggest preterm infants at birth have  
153 low abundance of *Clostridiales*, which became progressively and significantly more  
154 abundant only in the group with rapid progression of intestinal barrier maturation, while  
155 remained low in those with persistent high IP over the first two weeks of life.



156  
157 We further calculated the predictive power of microbiota composition in classifying IP  
158 using random forest supervised machine learning scheme. The top 15 phylotypes with  
159 the highest mean decrease gini index importance measure (**Supplemental Figure 5**)  
160 were used to fit a random effect logistic regression model of IP, 4 of which resulted  
161 significantly associated with low IP (**Supplemental File 5**), including three members of  
162 the order *Clostridiales*, *Coprococcus* (p-value = 0.004), *Lachnospiraceae* (p-value =  
163 0.007), *Veillonella dispar* (p-value = 0.01), and *Bifidobacterium* (p-value = 0.01) from the  
164 order of *Bifidobacteriales*. Interestingly, *Bifidobacteriales* was the second most  
165 abundant taxonomic groups in infants 6-24 months old, only lower than *Clostridiales*  
166 (**Supplemental Figure 4**).

167 *Clostridiales* and *Bifidobacterium* are highly active members of the intestinal microbiome

168 The level of bacterial transcriptional activities was characterized by studying the suite of  
169 genes present and expressed in preterm infant intestinal microbiota. A total of 869  
170 million metagenomic sequence reads (average of ~31.0 million sequence reads per  
171 sample) and 694 million metatranscriptomic sequence reads (average of ~53.4 million  
172 sequence reads per sample) were obtained after quality assessment. **Figure 4** shows  
173 that *Bifidobacterium breve* (*Actinobacteria*), *Veillonella* and *Clostridiales Family XI*  
174 *incertae Sedis* (*Clostridiales*) are the most transcriptionally active bacteria with high  
175 ratio of transcript abundances over gene abundances in all samples. Further, the levels  
176 of transcriptional activities of *Bifidobacterium breve* and *Clostridiales Family XI*  
177 *incertae Sedis* are correlated with a spearman correlation of 0.89, suggesting these  
178 two taxonomic groups are either functionally dependent or co-regulated (**Supplemental**

179 **Figure 6).** We observed increased abundance of both *Clostridiales* and  
180 *Bifidobacteriales* through the transition from the first two weeks (phase I) to later age of  
181 6-24 months (phase II/III) as further supporting their active contribution to the function of  
182 the GI microbiota after birth. Interestingly, *Clostridiales* and *Bifidobacteriales* are also  
183 the most abundant taxonomic groups in the intestinal microbiota of 6-24 months old  
184 infants (**Supplemental Figure 4, Supplemental File 3**). Specifically, members of the  
185 family *Clostridiales* have an average abundance of  $50\pm 3\%$  in phase II and III infants,  
186 compared to  $0.1\pm 0.4\%$  in phase I infants. *Bifidobacteriales* have an abundance of  $26\pm 5\%$   
187 in phase II and III as opposed to  $0.1\pm 0.3\%$  in phase I infants. Together with the previous  
188 observation that *Coprococcus* (*Clostridiales*), *Lachnospiraceae* (*Clostridiales*),  
189 *Veillonella dispar* (*Clostridiales*), and *Bifidobacterium* (*Bifidobacteriales*) are significantly  
190 associated with low IP, our results suggest the presence and more importantly the  
191 activity of bacterial members of *Clostridiales* and *Bifidobacteriales* are associated with  
192 improved intestinal barrier function.

193  
194 Conversely, the two *Enterobacteriaceae* species, *Klebsiella pneumoniae* and  
195 *Escherichia coli*, had low transcriptional activity despite their high relative abundance in  
196 the infant GI microbiota, questioning their functional contribution to the infant stool  
197 microbiota. Interestingly, *Enterobacteriaceae* and *Staphylococcus* are the most  
198 abundant bacterial taxa present in phase I infants but are rarely observed in phase II  
199 and III, suggesting their presence in the infant stools is temporary and might not  
200 contribute greatly to the functions provided by the GI microbiota.

201 Early breast milk feeding and low antibiotic exposure positively correlates with  
202 Clostridiales abundance and activities

203 The associations between intestinal microbiota and demographic, obstetric, and  
204 neonatal factors were also evaluated. Gneiss analysis suggests delivery mode, PPRM,  
205 gender, ethnicity, birthweight, maternal antibiotics use are not contributing covariates to  
206 the intestinal microbial community variance. Further, no bacterial phylotype was  
207 identified to significantly associate with these factors. However, breast milk feeding  
208 pattern and antibiotic exposure were significantly associated with increased abundance  
209 of *Clostridiales*. More specifically, early full exclusive breast milk feeding by study day  
210 10 (p-value = 0.0001) (**Supplemental Figure 7**) and antibiotic exposure limited to no  
211 more than 4 days (p-value = 0.05), were associated with the family *Lachnospiraceae* in  
212 the *Clostridiales* (p-value = 0.004) (**Supplemental Figure 8**). On the other hand,  
213 *Enterobacteriaceae*, particularly *Klebsiella pneumoniae* (as identified by metagenomics  
214 sequencing), was significantly associated with full breast milk feeding achieved after  
215 study day 10 (p-value = 0.01) (**Supplemental Figure 7**). These results strongly suggest  
216 members of the *Clostridiales* are significantly associated with low intestinal permeability,  
217 early full breast milk feeding, as well as shorter duration of antibiotic use.

218  
219 We further characterized the genotypic variation of *E. coli* through reconstructing MLST  
220 loci-sequences from metagenomes<sup>21</sup>, and compared them to 25 recently characterized  
221 *E. coli* MLST genotypes associated with NEC<sup>22,23</sup>. Five *E. coli* genotypes were only  
222 observed in samples with high IP, two of which, sequence type 73 and 131, were  
223 previously identified as uropathogenic *E. coli* (UPEC) strains associated with NEC and

224 infant mortality<sup>23</sup> (**Supplemental File 6**). One *E. coli* genotype 697 which was not  
225 recognized as a UPEC *E. coli* strain nor was observed in NEC<sup>23</sup>, was observed in both  
226 high and low IP samples. Two new MLST genotypes of *E. coli* were also observed. A  
227 minimum spanning tree on the sequence types is shown in **Supplemental Figure 9** and  
228 was used to demonstrate the relationship among genotypes of *E. coli*.

### 229 *Clostridiales* are highly prevalent in the GI microbiota of preterm infants

230 The most abundant bacterial species included *K. pneumoniae*, *Staphylococcus*  
231 *epidermidis*, *E. coli*, and *Enterococcus faecalis* were found with mean abundance of  
232 ~10-35% (S.D. ~15%-30%) and ~85-95% prevalence in these samples. In comparison,  
233 many species such as *Streptococcus agalactiae*, *B. breve*, *B. longum*, *Clostridium*  
234 *perfringens*, *Propionibacterium acnes*, *Bacteroides fragilis*, *Veillonella parvula*, and  
235 *Streptococcus thermophiles* were present in 15-70% of all samples and had a much  
236 lower level of abundance ranging from ~0.0001% to 1% (S.D. ~0.0001%-6%). Many of  
237 the members of *Clostridiales* were not resolved at the species or genus-level, while  
238 those taxonomically identified *Clostridiales* included *Coprococcus*, *Blautia*, *SMB53*,  
239 *Ruminococcus gnavus*, *Clostridium* spp., *Faecalibacterium prausnitzii*, *Dorea*,  
240 *Ruminococcus bromii*, *Roseburia*, *Pseudoramibacter* and *Butyricicoccus pullicaecorum*  
241 were detected in low or extremely low abundance yet high prevalence (**Supplemental**  
242 **File 3**). A previous study revealed that stool bacterial load varies greatly in the first few  
243 days of life but then reached and persisted in most infants in the range of 10<sup>9</sup> to 10<sup>10</sup>  
244 bacteria per gram of stool after one week of life<sup>24</sup>. Given our average sequencing depth  
245 is ~10<sup>4</sup>-10<sup>5</sup> it is likely that some bacterial taxonomic groups with low relative abundance  
246 (<0.001%) are below our detection limit, and their prevalence is underestimated. It is

247 expected that the prevalence of the members of *Clostridiales* can be higher than the  
248 currently observed 15-70% among samples in the GI microbiota of preterm infants. The  
249 marked discrepancy between bacterial abundance and prevalence suggests that  
250 bacterial species present in the intestinal microbiome of preterm infants can selectively  
251 colonize and grow under nutritional or antibiotic pressures.

## 252 **Discussion**

253 Preterm infants are at elevated risk for leaky gut, feeding intolerance, NEC and sepsis,  
254 and other short-term and long-term morbidities<sup>19</sup>. The pathophysiology of these  
255 disorders is likely multifactorial, involving a combination of intestinal mucosa barrier  
256 immaturity, imbalance in microvascular tone, aberrant microbial colonization and altered  
257 immune responses<sup>19,25,26</sup>. Previously, our group and others demonstrated that neonatal  
258 factors such as gestational age, antibiotic exposure, and exclusive breastmilk feeding  
259 affect intestinal mucosa barrier permeability in preterm infants<sup>16,27</sup>. With the rapid  
260 development of high-throughput sequencing technology, recent studies have evaluated  
261 the significant association between the composition of intestinal microbiota, neonatal  
262 intestinal health and development<sup>3,5,24</sup>. However, the relationships between intestinal  
263 microbiota and IP have not yet been evaluated in a high-risk preterm population. In this  
264 study, we investigated the early development of the intestinal microbiota and its  
265 association with IP in a cohort of 38 preterm infants sampled during the first two weeks  
266 of life. We observed that neonatal factors known to be associated with low IP, including  
267 early exclusive breast milk feeding and low antibiotic exposure, favored the early  
268 colonization of the gut microbiota by members of *Clostridiales*. The associations  
269 between neonatal factors, intestinal microbiota and intestinal barrier function further  
270 substantiate the multifactorial processes involved in gut barrier maturation, thus  
271 highlighting the impact of neonatal care practices and the potential for therapies such as  
272 rationally designed live biotherapeutics strategies to rapidly lower IP after birth in  
273 preterm infants.

274

275 A critical value of understanding the driver of IP, including associated microbiological  
276 biomarkers, is in its clinical significance in NEC risk diagnostics and disease prevention.  
277 The etiology of NEC involves the interaction between immature intestinal barrier and the  
278 developing intestinal microbial community that leads to an excessive inflammatory  
279 response<sup>25,26,28,29</sup>. Though IP is high at birth in preterm infants, it rapidly decreases over  
280 the first few days, which is associated with diminished risks for adverse outcomes<sup>16,30</sup>.  
281 Aberrant intestinal barrier function manifests by persistently high and/or late decrease in  
282 IP and is likely due to the physiological immaturity of the GI tract barrier function and  
283 altered levels of the normal microbial communities<sup>14,15</sup>, resulting in microbial invasion of  
284 the intestinal wall and gut lamina propria triggering a cascading inflammatory response  
285 and ultimately intestinal necrosis and severe infection<sup>2</sup>. Multiple studies have revealed  
286 microbial community dysbiosis is involved in stimulating a hyperinflammatory response  
287 that leads to NEC<sup>25,26,28,29</sup>. This community dysbiosis has been characterized by the  
288 presence of members of the family *Enterobacteriaceae* such as *E. coli*, *K. pneumonia*,  
289 as well as *Enterobacter cloacae*<sup>23,26,31</sup>. However, a generalized bacterial dysbiosis  
290 alone does not adequately explain NEC. Many preterm infants that are colonized by  
291 high abundance of *Enterobacteriaceae* do not develop NEC<sup>32</sup>, and many NEC cases  
292 lacked intestinal colonization of *Enterobacteriaceae*<sup>33</sup>. In this study, *Enterobacteriaceae*  
293 was significantly associated with both elevated IP and later attainment of full exclusive  
294 breastmilk feeding (>10 days), while other beneficial bacteria such as members of  
295 *Clostridiales* and *Bifidobacterium* were significantly associated with improved IP and  
296 earlier breastmilk feeding attainment. These results emphasize the importance of a  
297 holistic understanding of the etiology of NEC, including the mechanistic characterization

298 of the functional synergy and/or competition among different bacterial groups, as well as  
299 nutritional factors, drug uses and host genetics. Further, the links established by  
300 previous microbiota association studies could not elucidate the causalities between gut  
301 microbiota and NEC development. Our study prospectively associates maturation of gut  
302 barrier function with specific microbial community composition and structure for the first  
303 time, prior to the onset of NEC. Research on neonatal IP will not only further our  
304 understanding of NEC etiology but will help identify the “window of opportunity” for  
305 intervention prior to the onset of NEC. Early prediction and prevention of NEC will  
306 ultimately improve overall infant survival rates.

307

308 Multiple intrinsic and extrinsic factors affect newborn intestinal microbiota, such as  
309 maternal diet, delivery mode, breast milk feeding, antibiotic exposure, and other early  
310 life environmental exposures <sup>7,34</sup>. In this study, early exclusive breast milk feeding and  
311 low antibiotic exposure was associated with the presence of members of *Clostridiales* in  
312 the stool microbiota of preterm infants. We have previously observed these two factors  
313 are associated with improved IP in preterm infants <sup>16</sup>, which has been shown to be  
314 critically protective against NEC <sup>35</sup>. This observation emphasizes the importance of  
315 factors such as clinical administration of nutritional supplement and limiting exposure to  
316 antibiotic in neonatal care units. Interestingly, *Clostridiales* strains were recently shown  
317 to be sensitive to many antibiotics, including ampicillin and amoxicillin <sup>36</sup>, both  
318 commonly used for the neonate clinical management. Further understanding of the  
319 selective nutritional requirement that favor the growth of these bacteria would afford the



320 development of novel nutritional supplemental strategies to limit the incidence of NEC  
321 and improve clinical outcomes in preterm infants.

322

323 Current therapies for NEC are mostly ineffective, and involve antibiotic treatment and  
324 surgical interventions, including drain placement or bowel resection. These procedures  
325 are associated with poor prognosis and a mortality rate of ~50% due to the rapid  
326 progression of the disease<sup>37</sup>. Live biotherapeutics products (LBP) are being considered,  
327 but selecting the appropriate one remains a major challenge. LBP therapies are  
328 promising, low-cost, and constitute a likely safe preventive measure to improve  
329 intestinal barrier maturation and reduce NEC incidence in at-risk preterm infants<sup>38</sup>. In  
330 an experimental mouse model of NEC, the administration of *Bifidobacterium infantis*  
331 prevented an increase in IP, stabilized tight junction proteins, and reduced NEC  
332 incidence<sup>28</sup>. Translating these findings in human has been challenging. There have  
333 been at least 11 randomized controlled trials and a recent meta-analysis of LBP  
334 supplementation to prevent NEC in preterm neonates<sup>39</sup>. Although there was a 30%  
335 reduction in NEC incidence in these trials, various formulations, doses, and duration of  
336 therapy were used, infants <1000 g BW with the highest NEC incidence were under-  
337 represented, and no Food and Drug Administration-approved products are available to  
338 assure quality and safety under good manufacturing practices.

339

340 *Clostridiales* offer a new opportunity to develop a LBP for the prevention of NEC, in  
341 combination with strains of *Lactobacillus* and *Bifidobacterium* already available.

342 Members of the family *Clostridiales* often have anti-inflammatory properties associated

343 with their fermentative metabolism of carbohydrates and amino acids<sup>40</sup>. Because of the  
344 difficulties to culture *Clostridiales*, it has been largely overlooked. A few species  
345 belonging to this family are known for their pathogenicity and include *C. botulinum*, *C.*  
346 *perfringens*, *C. tetani*, and *C. difficile*<sup>41</sup>, however these are opportunistic pathogens and  
347 not commensal of the intestinal microbiota. The application of culture-independent high-  
348 throughput sequencing identified many formerly unculturable *Clostridiales* species, and  
349 the group is now thought to be one of the predominant groups of microbes inhabiting  
350 the GI tract, comprising ~30-40% abundance of the adult intestinal microbiota<sup>42</sup>. These  
351 species form the basis of the microbiome therapeutics product, SER109, for the  
352 treatment of *C. difficile* infection in adults<sup>43</sup>. *Clostridiales* are heterogeneous in terms of  
353 their enzymatic, and metabolic properties, and produce beneficial short-chain fatty acid  
354 (SCFA) such as acetate, propionate, and butyrate<sup>44</sup>. Further, *Clostridiales* have been  
355 shown to stimulate the production of intestinal epithelial cytokines that have been  
356 associated with the improvement of intestinal dysbiosis, and marked reduction in  
357 inflammation<sup>36,45,46</sup>. The recent characterization of 46 strains of newly isolated  
358 *Clostridiales* revealed their ability to induce regulatory T cells and a protection against  
359 colitis and allergic responses<sup>45</sup>. Seventeen strains of human-derived *Clostridiales*  
360 species were rationally selected using gnotobiotic mice and the cocktail shown to have  
361 prophylactic effect in mouse colitis<sup>36,46</sup>. In addition, the administration of *Clostridiales*  
362 protects the host from pathogen infection and abrogated intestinal pathology<sup>47</sup>. In term  
363 infants, the presence of *Clostridiales* in the intestinal microbiota was demonstrated to  
364 prevent colonization by bacterial pathogens such as *S. Typhimurium*<sup>48</sup>. Unfortunately,  
365 the current standard application of 16S rRNA V4 or V3-V4 amplicon sequencing is not

366 capable to resolve the species of *Clostridiales* present in a sample <sup>49</sup>. Future taxonomic  
367 and functional characterization of *Clostridiales* species will greatly improve our  
368 capability to develop novel diagnostic and treatment strategies, and potentially prevent  
369 microbial community-mediated intestinal dysbiosis in preterm infants to optimize  
370 intestinal maturation and limit the burden of prematurity <sup>23</sup>.

## 371 **Methods and Materials**

### 372 Participants and intestinal permeability measurement

373 The institutional review boards of the University of Maryland and Mercy Medical Center  
374 approved the study protocol and informed consent was obtained from parents for  
375 participation of their infants in the study. All methods were performed in accordance with  
376 the relevant guidelines and regulations. Thirty-eight preterm infants 24<sup>0/7</sup>-32<sup>6/7</sup> weeks  
377 GA were enrolled within 4 days after birth and received 1 ml/kg of the non-metabolized  
378 sugar probes lactulose (La) (marker of intestinal paracellular transport)/rhamnose (Rh)  
379 (marker of intestinal transcellular transport) (8.6 g La +140 mg Rh/100 mL) enterally on  
380 study days 1, 8 ± 2 and 15 ± 2. La/Rh was measured by high-pressure liquid  
381 chromatography (HPLC) in urine collected over a 4h period following administration of  
382 the sugar probes as previously described<sup>16</sup>. High or low intestinal permeability was  
383 defined by a La/Rh >0.05 or ≤0.05 respectively, as validated and applied previously<sup>16</sup>.  
384 PMA was calculated as gestational age at birth plus week of life as defined previously<sup>50</sup>.  
385 Fecal samples (~1g) were collected at the same time, stored immediately in 2 ml of  
386 RNAlater (QIAGEN). Urine and fecal samples were archived at -80°C until processed. A  
387 standard feeding protocol was used for all preterm participants. To compare microbiota  
388 of infants at different growth phases<sup>17,19</sup>, 16 samples from older term infants at phase  
389 II/III (6-24 months old) from a previous study<sup>51</sup> were included in the comparative  
390 analyses.

391 Stool nucleic acid extraction and sequencing

392 DNA was extracted from all samples as previously reported<sup>52</sup>. Briefly, a 500 µl aliquot  
393 of fecal material mixture was homogenized and carefully washed twice in PBS buffer.  
394 Enzymatic lysis using mutanolysin, lysostaphin and lysozyme was performed, followed  
395 by proteinase K, SDS treatment and bead beating. DNA purification from lysates was  
396 done on a QIAasymphony automated platform. PCR amplification of the V3-V4 variable  
397 region of 16S rRNA gene was performed using dual-barcoded universal primers 319F  
398 and 806R as previously described<sup>53</sup>. High-throughput sequencing of the amplicons was  
399 performed on an Illumina MiSeq platform using the 300 bp paired-end protocol.  
400 Metagenomic sequencing libraries were constructed from the same DNA using Illumina  
401 Nextera XT kit according to the manufacturer recommendations.

402

403 Total RNA was extracted from 250 µl of stool homogenized in RNALater. Briefly, lysis  
404 was performed by bead beating using the FastPrep lysing matrix B protocol (MP  
405 Biomedicals), followed with two rounds of protein cleanup using phenol-chloroform in  
406 5PRIME heavy phase lock tubes (QuantaBio) and precipitation of total nucleic acids  
407 using isopropanol. Genomic DNA was removed using TURBO DNase (Ambion).  
408 Ribosomal RNAs were depleted using the Gram-negative and Human/mouse/rat Ribo-  
409 Zero rRNA Removal kits (Epicentre Technologies). The resulting RNA was used for  
410 library construction using Illumina TruSeq stranded mRNA library preparation kit  
411 according to the manufacturer's recommendations. Quantification of the constructed  
412 RNA libraries was performed on an Agilent Bioanalyzer using the DNA 1000 Nano kit.  
413 Both metagenome and metatranscriptome samples were sequenced on an Illumina

414 HiSeq 4000 instrument at the Genomics Resource Center (GRC), Institute for Genome  
415 Sciences, University of Maryland School of Medicine using the 150 bp paired-end  
416 protocol.

#### 417 Bioinformatics analysis of intestinal microbiota

418 Sequencing read quality assessment was performed using strict criteria to ensure high  
419 quality and complete sequences of the amplified the V3-V4 regions of the 16S rRNA  
420 gene, according to the procedures, programs and citations, and parameters described  
421 previously<sup>53</sup>. Briefly, a sequence read was trimmed at the beginning of a 4 bp sliding  
422 window if the average quality score was less than Q15. The sequence read was then  
423 assessed for length and retained if it was at least 75% of its original length. The paired-  
424 end reads were assembled to take advantage of the ~90bp overlapping region. These  
425 sequences were further de-multiplexed the sequence reads by individual samples.  
426 Additional quality filtering was applied that removed sequences with more than one  
427 mismatch in the barcode sequence tag or with ambiguous nucleotide. Taxonomic  
428 assignments were performed on each sequence using the Ribosomal Database Project  
429 trained on the Greengene database (Aug 2013 version), using 0.8 confidence values as  
430 cutoff. Clustering taxonomic profiles was performed as previously described<sup>52</sup>. The  
431 number of clusters was validated using gap statistics implemented in the *cluster*  
432 package in R<sup>54</sup> by calculating the goodness of clustering measure. Within-sample  
433 diversity was estimated using both observed OTUs to measure community richness and  
434 Shannon diversity index. Linear discriminant analysis (LDA) effect size (LEfSe) analysis  
435<sup>55</sup> was used to identify fecal phylotypes that could explain the differences between  
436 infants with low or high La/Rh ratio on different sampling days. For LEfSe, the alpha

437 value for the non-parametric factorial Kruskal-Wallis (KW) sum-rank test was set at 0.05  
438 and the threshold for the logarithmic LDA model<sup>56</sup> score for discriminative features was  
439 set at 2.0. An all-against-all BLAST search in multi-class analysis was performed.  
440 Balance tree analysis was applied as implemented in Gneiss, and trees were generated  
441 using Ward hierarchical clustering of abundance profiles. Balance was computed as the  
442 isometric log ratio of mean abundances at each bifurcating node in the tree, to  
443 characterize the “flow” of changes in the abundance of a group of correlated bacteria in  
444 a microbial community<sup>20</sup>. Multivariate response linear regression on the calculated  
445 balances was performed, and multiple factors were included as covariates, including  
446 antibiotics use, maternal antibiotics use, delivery mode, preterm premature rupture of  
447 membranes (PPROM), feeding pattern and source, intestinal permeability, birthweight,  
448 gender, ethnicity, GA and PMA. Leave-one-variable-out approach was used to calculate  
449 the change in R square to evaluate the effect of a single covariate on the community.  
450 Ten-fold cross validation was performed to mitigate the common overfitting issues in  
451 statistical modelling.

## 452 Statistical Analysis

453 An adaptive spline logistic regression model implemented in spmrf R package<sup>57</sup> was  
454 adapted to determine the associations between intestinal permeability and relative  
455 abundance of bacterial phylotypes. This model is a locally adaptive nonparametric fitting  
456 method that operates within a Bayesian framework, which uses shrinkage prior Markov  
457 random fields to induce sparsity and provides a combination of local adaptation and  
458 global control<sup>57</sup>. The analysis was performed on the phylotypes present in at least 15%  
459 of all samples, and the effect size was defined as the difference between the extreme

460 values of the probability of intestinal permeability index. Given that there were multiple  
461 samples collected from each subject, this model takes into consideration of the  
462 dependencies among samples within a subject. Bayesian goodness-of-fit p-value  
463 implemented in R package rstan<sup>58</sup> was used to assess the significance of the  
464 association between phylotypes and metadata including antibiotics use, maternal  
465 antibiotics use, delivery mode, PPRM, feeding pattern, intestinal permeability,  
466 birthweight, gender, ethnicity, gestational age (GA), and postmenstrual age (PMA). R  
467 code implementation of the model is provided in **Supplemental File 1**. We further  
468 adapted random forest supervised machine learning scheme implemented in R package  
469 randomForest<sup>59</sup> to test the predictability of the phylotypes of microbial community on  
470 intestinal permeability. The top 15 phylotypes relative abundance with highest mean  
471 decrease gini index importance measure, were fitted to a random effect logistic  
472 regression model of intestinal permeability that was defined as a dichotomous variable  
473 high (La/Rh >0.05) or low (La/Rh ≤0.05). The relative abundances of phylotypes were  
474 centered to the mean and scaled by standard deviation to apply to the model to  
475 normalize relative abundances. R code implementation of the model is provided in  
476 **Supplemental File 2**.

#### 477 Intestinal microbiome analyses

478 Metagenomic and metatranscriptomic sequence data were pre-processed using the  
479 following steps: 1) human sequence reads and rRNA LSU/SSU reads were removed  
480 using BMTagger v3.101<sup>60</sup> using a standard human genome reference (GRCh37.p5)<sup>61</sup>;  
481 2) rRNA sequence reads were removed *in silico* by aligning all reads using Bowtie v1<sup>62</sup>  
482 to the SILVA PARC ribosomal-subunit sequence database<sup>63</sup>. Sequence read pairs



483 were removed even if only one of the reads matched to the human genome reference or  
484 to rRNA; 3) the Illumina adapter was trimmed using Trimmomatic<sup>64</sup>; 4) sequence reads  
485 with average quality greater than Q15 over a sliding window of 4 bp were trimmed  
486 before the window, assessed for length and removed if less than 75% of the original  
487 length; and 5) no ambiguous base pairs were allowed. The taxonomic composition of  
488 the microbiomes was established using MetaPhlAn version 2<sup>65</sup>. Normalization using  
489 Witten-Bell smoothing was performed since metatranscriptomes are a random sampling  
490 of all expressed genes and transcripts can be identified that correspond to genes not  
491 represented in the metagenome, particularly for low abundance species that were  
492 metabolically active<sup>66</sup>. The relative expression of a gene in a sample was calculated by  
493 normalizing the smoothed value of the expression level in the metatranscriptome by the  
494 smoothed value of the corresponding gene abundance in the metagenome, as  
495 suggested previously<sup>66,67</sup>. Correlation plots were generated using R *corrplot* package  
496<sup>68</sup>. Genotypic variation of *Escherichia coli* was performed through reconstructing MLST  
497 loci-sequences from metagenomes using metaMLST program<sup>21</sup>. The resulting STs  
498 were visualized to show related genotypes of *E. coli* strains on a minimum spanning  
499 tree computed by a goeBURST algorithm<sup>69</sup> implemented in PHYLOViZ<sup>70</sup>.

## 500 **Conclusion**

501 At birth there is low abundance of *Clostridiales* in preterm infants with progressive,  
502 significant increase in abundance in the group with rapid progression toward intestinal  
503 barrier maturation, but remained low in those with persistent high IP over the first two  
504 weeks of life. We further identified neonatal factors previously identified to promote  
505 intestinal barrier maturation, including early exclusive breastmilk feeding and shorter  
506 duration antibiotic exposure, favor the early colonization of the gut microbiota by  
507 members of the *Clostridiales*, which altogether are associated with improved intestinal  
508 barrier function in preterm infants. This highlights the importance of factors such as  
509 clinical administration of nutritional supplement and limiting exposure to antibiotic in the  
510 high-risk preterm population. Our study suggests rationally selected and formulated  
511 *Clostridiales* species could constitute a promising LBP candidate for the prevention of  
512 NEC, especially when combined with already available strains of *Bifidobacterium* and  
513 *Lactobacillus*. The rationale for this intervention is supported by our correlative finding  
514 between increased *Clostridiales* abundance and intestinal barrier maturation of preterm  
515 neonates at-risk for NEC development. Identification of specific strains of *Clostridiales*,  
516 their functions in mediating intestinal barrier maturation, LBP formulation and  
517 manufacturing, dosing, safety and efficacy evaluation will be needed to support their  
518 application as oral supplementation to promote intestinal barrier maturation and overall  
519 health of preterm neonates. Early prediction and prevention of NEC will ultimately  
520 improve overall infant survival rates.

## 521 References

- 522 1 Lee, S. H. Intestinal permeability regulation by tight junction: implication on  
523 inflammatory bowel diseases. *Intest Res* **13**, 11-18, doi:10.5217/ir.2015.13.1.11 (2015).
- 524 2 Fasano, A. Physiological, pathological, and therapeutic implications of zonulin-mediated  
525 intestinal barrier modulation: living life on the edge of the wall. *Am J Pathol* **173**, 1243-  
526 1252, doi:10.2353/ajpath.2008.080192 (2008).
- 527 3 Neish, A. S. Microbes in gastrointestinal health and disease. *Gastroenterology* **136**, 65-  
528 80, doi:10.1053/j.gastro.2008.10.080 (2009).
- 529 4 Sharon, I. *et al.* Time series community genomics analysis reveals rapid shifts in bacterial  
530 species, strains, and phage during infant gut colonization. *Genome Res* **23**, 111-120,  
531 doi:10.1101/gr.142315.112 (2013).
- 532 5 Belkaid, Y. & Hand, T. W. Role of the microbiota in immunity and inflammation. *Cell* **157**,  
533 121-141, doi:10.1016/j.cell.2014.03.011 (2014).
- 534 6 Arrieta, M. C., Stiemsma, L. T., Amenyogbe, N., Brown, E. M. & Finlay, B. The intestinal  
535 microbiome in early life: health and disease. *Front Immunol* **5**, 427,  
536 doi:10.3389/fimmu.2014.00427 (2014).
- 537 7 Madan, J. C., Farzan, S. F., Hibberd, P. L. & Karagas, M. R. Normal neonatal microbiome  
538 variation in relation to environmental factors, infection and allergy. *Curr Opin Pediatr* **24**,  
539 753-759, doi:10.1097/MOP.0b013e32835a1ac8 (2012).
- 540 8 Arrieta, M. C. *et al.* Early infancy microbial and metabolic alterations affect risk of  
541 childhood asthma. *Sci Transl Med* **7**, 307ra152, doi:10.1126/scitranslmed.aab2271  
542 (2015).
- 543 9 Vatanen, T. *et al.* Variation in Microbiome LPS Immunogenicity Contributes to  
544 Autoimmunity in Humans. *Cell* **165**, 842-853, doi:10.1016/j.cell.2016.04.007 (2016).
- 545 10 Cenit, M. C., Olivares, M., Codoner-Franch, P. & Sanz, Y. Intestinal Microbiota and Celiac  
546 Disease: Cause, Consequence or Co-Evolution? *Nutrients* **7**, 6900-6923,  
547 doi:10.3390/nu7085314 (2015).
- 548 11 Gevers, D. *et al.* The treatment-naïve microbiome in new-onset Crohn's disease. *Cell*  
549 *Host Microbe* **15**, 382-392, doi:10.1016/j.chom.2014.02.005 (2014).
- 550 12 Cho, I. *et al.* Antibiotics in early life alter the murine colonic microbiome and adiposity.  
551 *Nature* **488**, 621-626, doi:10.1038/nature11400 (2012).
- 552 13 Guner, Y. S. *et al.* State-based analysis of necrotizing enterocolitis outcomes. *J Surg Res*  
553 **157**, 21-29, doi:10.1016/j.jss.2008.11.008 (2009).
- 554 14 Fitzgibbons, S. C. *et al.* Mortality of necrotizing enterocolitis expressed by birth weight  
555 categories. *J Pediatr Surg* **44**, 1072-1075; discussion 1075-1076, doi:S0022-  
556 3468(09)00160-2 [pii]  
557 10.1016/j.jpedsurg.2009.02.013 (2009).
- 558 15 Fox, T. P. & Godavitarne, C. What really causes necrotising enterocolitis? *ISRN*  
559 *Gastroenterol* **2012**, 628317, doi:10.5402/2012/628317 (2012).
- 560 16 Saleem, B. *et al.* Intestinal Barrier Maturation in Very Low Birthweight Infants:  
561 Relationship to Feeding and Antibiotic Exposure. *J Pediatr* **183**, 31-36 e31,  
562 doi:10.1016/j.jpeds.2017.01.013 (2017).

- 563 17 Mshvildadze, M., Neu, J. & Mai, V. Intestinal microbiota development in the premature  
564 neonate: establishment of a lasting commensal relationship? *Nutrition reviews* **66**, 658-  
565 663, doi:10.1111/j.1753-4887.2008.00119.x (2008).
- 566 18 Mackie, R. I., Sghir, A. & Gaskins, H. R. Developmental microbial ecology of the neonatal  
567 gastrointestinal tract. *Am J Clin Nutr* **69**, 1035S-1045S (1999).
- 568 19 Unger, S., Stintzi, A., Shah, P., Mack, D. & O'Connor, D. L. Gut microbiota of the very-  
569 low-birth-weight infant. *Pediatr Res* **77**, 205-213, doi:10.1038/pr.2014.162 (2015).
- 570 20 Morton, J. T. *et al.* Balance Trees Reveal Microbial Niche Differentiation. *mSystems* **2**,  
571 doi:10.1128/mSystems.00162-16 (2017).
- 572 21 Zolfo, M., Tett, A., Jousson, O., Donati, C. & Segata, N. MetaMLST: multi-locus strain-  
573 level bacterial typing from metagenomic samples. *Nucleic Acids Res* **45**, e7,  
574 doi:10.1093/nar/gkw837 (2017).
- 575 22 Guner, Y. S., Malhotra, A., Ford, H. R., Stein, J. E. & Kelly, L. K. Association of Escherichia  
576 coli O157:H7 with necrotizing enterocolitis in a full-term infant. *Pediatr Surg Int* **25**, 459-  
577 463, doi:10.1007/s00383-009-2365-3 (2009).
- 578 23 Ward, D. V. *et al.* Metagenomic Sequencing with Strain-Level Resolution Implicates  
579 Uropathogenic E. coli in Necrotizing Enterocolitis and Mortality in Preterm Infants. *Cell*  
580 *Rep* **14**, 2912-2924, doi:10.1016/j.celrep.2016.03.015 (2016).
- 581 24 Palmer, C., Bik, E. M., Digiulio, D. B., Relman, D. A. & Brown, P. O. Development of the  
582 Human Infant Intestinal Microbiota. *PLoS Biol* **5**, e177 (2007).
- 583 25 Neu, J. & Walker, W. A. Necrotizing enterocolitis. *N Engl J Med* **364**, 255-264,  
584 doi:10.1056/NEJMra1005408 (2011).
- 585 26 Mai, V. *et al.* Fecal microbiota in premature infants prior to necrotizing enterocolitis.  
586 *PLoS One* **6**, e20647, doi:10.1371/journal.pone.0020647 (2011).
- 587 27 Taylor, S. N., Basile, L. A., Ebeling, M. & Wagner, C. L. Intestinal permeability in preterm  
588 infants by feeding type: mother's milk versus formula. *Breastfeed Med* **4**, 11-15,  
589 doi:10.1089/bfm.2008.0114 (2009).
- 590 28 Bergmann, K. R. *et al.* Bifidobacteria stabilize claudins at tight junctions and prevent  
591 intestinal barrier dysfunction in mouse necrotizing enterocolitis. *Am J Pathol* **182**, 1595-  
592 1606, doi:10.1016/j.ajpath.2013.01.013 (2013).
- 593 29 Nanthakumar, N. *et al.* The mechanism of excessive intestinal inflammation in  
594 necrotizing enterocolitis: an immature innate immune response. *PLoS One* **6**, e17776,  
595 doi:10.1371/journal.pone.0017776 (2011).
- 596 30 van Elburg, R. M., Fetter, W. P., Bunkers, C. M. & Heymans, H. S. Intestinal permeability  
597 in relation to birth weight and gestational and postnatal age. *Arch Dis Child Fetal*  
598 *Neonatal Ed* **88**, F52-55 (2003).
- 599 31 Carlisle, E. M. & Morowitz, M. J. The intestinal microbiome and necrotizing enterocolitis.  
600 *Curr Opin Pediatr* **25**, 382-387, doi:10.1097/MOP.0b013e3283600e91 (2013).
- 601 32 La Rosa, P. S. *et al.* Patterned progression of bacterial populations in the premature  
602 infant gut. *Proc Natl Acad Sci U S A* **111**, 12522-12527, doi:10.1073/pnas.1409497111  
603 (2014).
- 604 33 Barron, L. K. *et al.* Independence of gut bacterial content and neonatal necrotizing  
605 enterocolitis severity. *J Pediatr Surg* **52**, 993-998, doi:10.1016/j.jpedsurg.2017.03.029  
606 (2017).

- 607 34 Penders, J. *et al.* Factors influencing the composition of the intestinal microbiota in early  
608 infancy. *Pediatrics* **118**, 511-521, doi:10.1542/peds.2005-2824 (2006).
- 609 35 Colaizy, T. T. *et al.* Impact of Optimized Breastfeeding on the Costs of Necrotizing  
610 Enterocolitis in Extremely Low Birthweight Infants. *J Pediatr* **175**, 100-105 e102,  
611 doi:10.1016/j.jpeds.2016.03.040 (2016).
- 612 36 Narushima, S. *et al.* Characterization of the 17 strains of regulatory T cell-inducing  
613 human-derived Clostridia. *Gut microbes* **5**, 333-339, doi:10.4161/gmic.28572 (2014).
- 614 37 Blakely, M. L. *et al.* Postoperative outcomes of extremely low birth-weight infants with  
615 necrotizing enterocolitis or isolated intestinal perforation: a prospective cohort study by  
616 the NICHD Neonatal Research Network. *Ann Surg* **241**, 984-989; discussion 989-994  
617 (2005).
- 618 38 Stratiki, Z. *et al.* The effect of a bifidobacter supplemented bovine milk on intestinal  
619 permeability of preterm infants. *Early Hum Dev* **83**, 575-579,  
620 doi:10.1016/j.earlhumdev.2006.12.002 (2007).
- 621 39 Deshpande, G., Rao, S., Patole, S. & Bulsara, M. Updated meta-analysis of probiotics for  
622 preventing necrotizing enterocolitis in preterm neonates. *Pediatrics* **125**, 921-930,  
623 doi:peds.2009-1301 [pii]  
624 10.1542/peds.2009-1301 (2010).
- 625 40 Stefka, A. T. *et al.* Commensal bacteria protect against food allergen sensitization. *Proc*  
626 *Natl Acad Sci U S A* **111**, 13145-13150, doi:10.1073/pnas.1412008111 (2014).
- 627 41 Rajilic-Stojanovic, M., Smidt, H. & de Vos, W. M. Diversity of the human gastrointestinal  
628 tract microbiota revisited. *Environ Microbiol* **9**, 2125-2136, doi:10.1111/j.1462-  
629 2920.2007.01369.x (2007).
- 630 42 Walker, A. W. *et al.* Dominant and diet-responsive groups of bacteria within the human  
631 colonic microbiota. *Isme J* **5**, 220-230, doi:10.1038/ismej.2010.118 (2011).
- 632 43 Khanna, S. *et al.* A Novel Microbiome Therapeutic Increases Gut Microbial Diversity and  
633 Prevents Recurrent Clostridium difficile Infection. *J Infect Dis* **214**, 173-181,  
634 doi:10.1093/infdis/jiv766 (2016).
- 635 44 Smith, P. M. *et al.* The microbial metabolites, short-chain fatty acids, regulate colonic  
636 Treg cell homeostasis. *Science* **341**, 569-573, doi:10.1126/science.1241165 (2013).
- 637 45 Atarashi, K. *et al.* Induction of colonic regulatory T cells by indigenous Clostridium  
638 species. *Science* **331**, 337-341, doi:10.1126/science.1198469 (2011).
- 639 46 Atarashi, K. *et al.* Treg induction by a rationally selected mixture of Clostridia strains  
640 from the human microbiota. *Nature* **500**, 232-236, doi:10.1038/nature12331 (2013).
- 641 47 McMurtry, V. E. *et al.* Bacterial diversity and Clostridia abundance decrease with  
642 increasing severity of necrotizing enterocolitis. *Microbiome* **3**, 11, doi:10.1186/s40168-  
643 015-0075-8 (2015).
- 644 48 Kim, Y. G. *et al.* Neonatal acquisition of Clostridia species protects against colonization  
645 by bacterial pathogens. *Science* **356**, 315-319, doi:10.1126/science.aag2029 (2017).
- 646 49 Jovel, J. *et al.* Characterization of the Gut Microbiome Using 16S or Shotgun  
647 Metagenomics. *Frontiers in microbiology* **7**, 459, doi:10.3389/fmicb.2016.00459 (2016).
- 648 50 Grier, A. *et al.* Impact of prematurity and nutrition on the developing gut microbiome  
649 and preterm infant growth. *Microbiome* **5**, 158, doi:10.1186/s40168-017-0377-0 (2017).

- 650 51 Sellitto, M. *et al.* Proof of concept of microbiome-metabolome analysis and delayed  
651 gluten exposure on celiac disease autoimmunity in genetically at-risk infants. *PLoS One* **7**,  
652 e33387, doi:10.1371/journal.pone.0033387 (2012).
- 653 52 Ravel, J. *et al.* Vaginal microbiome of reproductive-age women. *Proc. Natl. Acad. Sci.*  
654 *USA* **108 Suppl 1**, 4680-4687, doi:10.1073/pnas.1002611107 (2011).
- 655 53 Fadrosch, D. W. *et al.* An improved dual-indexing approach for multiplexed 16S rRNA  
656 gene sequencing on the Illumina MiSeq platform. *Microbiome* **2**, 6, doi:10.1186/2049-  
657 2618-2-6 (2014).
- 658 54 Maechler, M. *cluster: "Finding Groups in Data": Cluster Analysis Extended Rousseeuw et*  
659 *al.*, (2016).
- 660 55 Segata, N. *et al.* Metagenomic biomarker discovery and explanation. *Genome Biol* **12**,  
661 R60, doi:10.1186/gb-2011-12-6-r60 (2011).
- 662 56 Fisher, R. A. The use of multiple measurements in taxonomic problems. *Ann Eugenics* **7**  
663 (1936).
- 664 57 Faulkner, J. R., Minin, V. Locally adaptive smoothing with Markov random fields and  
665 shrinkage priors. *Bayesian Analysis* **13**, 225-252 (2018).
- 666 58 Team, S. D. RStan: the R interface to Stan. R package version 2.17.3. (2018).
- 667 59 Liaw, A. & Wiener, M. Classification and Regression by randomForest. . *R News* **2**, 18-22  
668 (2002).
- 669 60 Rotmistrovsky, K. & Agarwala, R. *BMTagger: Best Match Tagger for removing human*  
670 *reads from metagenomics datasets* (NCBI/NLM, National Institutes of Health, 2011).
- 671 61 Church, D. M. *et al.* Modernizing reference genome assemblies. *PLoS Biol* **9**, e1001091,  
672 doi:10.1371/journal.pbio.1001091 (2011).
- 673 62 Langmead, B., Trapnell, C., Pop, M. & Salzberg, S. L. Ultrafast and memory-efficient  
674 alignment of short DNA sequences to the human genome. *Genome Biol* **10**, R25,  
675 doi:10.1186/gb-2009-10-3-r25 (2009).
- 676 63 Quast, C. *et al.* The SILVA ribosomal RNA gene database project: improved data  
677 processing and web-based tools. *Nucleic Acids Res* **41**, D590-596,  
678 doi:10.1093/nar/gks1219 (2013).
- 679 64 Bolger, A. M., Lohse, M. & Usadel, B. Trimmomatic: a flexible trimmer for Illumina  
680 sequence data. *Bioinformatics* **30**, 2114-2120, doi:10.1093/bioinformatics/btu170  
681 (2014).
- 682 65 Segata, N. *et al.* Metagenomic microbial community profiling using unique clade-specific  
683 marker genes. *Nat Methods* **9**, 811-814, doi:10.1038/nmeth.2066 (2012).
- 684 66 Franzosa, E. A. *et al.* Relating the metatranscriptome and metagenome of the human  
685 gut. *Proc Natl Acad Sci U S A* **111**, E2329-2338, doi:10.1073/pnas.1319284111 (2014).
- 686 67 Franzosa, E. A. *et al.* Sequencing and beyond: integrating molecular 'omics' for microbial  
687 community profiling. *Nat Rev Microbiol* **13**, 360-372, doi:10.1038/nrmicro3451 (2015).
- 688 68 Wei, T. & Simko, V. R package "corrplot": Visualization of a Correlation Matrix. (2017).
- 689 69 Francisco, A. P., Bugalho, M., Ramirez, M. & Carrico, J. A. Global optimal eBURST analysis  
690 of multilocus typing data using a graphic matroid approach. *BMC Bioinformatics* **10**, 152,  
691 doi:10.1186/1471-2105-10-152 (2009).

692 70 Nascimento, M. *et al.* PHYLOViZ 2.0: providing scalable data integration and visualization  
693 for multiple phylogenetic inference methods. *Bioinformatics* **33**, 128-129,  
694 doi:10.1093/bioinformatics/btw582 (2017).  
695 71 Oksanen, J. *et al.* vegan: Community Ecology Package. *R package version 2.0-2*. (2011).  
696

697 **Data Availability**

698 All 16S rRNA sequence data were deposited in SRA SUB3616368 under BioProject  
699 PRJNA432222 (release upon acceptance).

700 **Contributions**

701 B.M., A.W., A.F., J.R., and R.V. designed the research. B.M., E.M., H.Y., and M.H.  
702 performed the research. B.M. and P.G. analyzed the data. B.M., E.M., J.R., and R.V.  
703 wrote the paper.

704 **Acknowledgements**

705 This study was funded by The Gerber Foundation and NCCIH (National Center for  
706 Complementary and Integrative Health, AT006945).

707 This work is dedicated to the memory of our colleague Bushra Saleem, M.B.B.S., who  
708 contributed to the design and conduct of the study.

709 The authors thank Dr. Emmanuel Mongodin and Dr. Lauren Hittle, PhD at the Institute  
710 for Genome Sciences - University of Maryland School of Medicine for their helpful  
711 assistance in total RNA extraction.

712 **Competing interest statement**

713 The authors declare no competing financial and non-financial interests.

714



## 715 **Figures**

716

717 **Figure 1.** Boxplots comparing levels of intestinal permeability and microbial community  
718 diversity at study days 1, 8, and 15 in a cohort of 43 preterm infants (<33 weeks  
719 gestational age). Intestinal permeability is measured by non-metabolized sugar probes  
720 lactulose (La) (marker of intestinal paracellular transport)/rhamnose (Rh) (marker of  
721 intestinal transcellular transport). Microbial community diversity was calculated by OTU  
722 (Operational Taxonomic Units) richness. Wilcoxon rank sum test and a false discovery  
723 rate of 5% was used in significance test. Median values and interquartile of the values  
724 were shown in box. **(A)** Intestinal permeability (p-value = 0.002) and community  
725 diversity at the three study time points (p-value = 0.02). **(B)** Community diversity (p-  
726 value < 0.001) in infants with low and high intestinal permeability defined by a  
727 La/Rh >0.05 or <=0.05 respectively (1).

728

729 **Figure 2.** Cumulative relative abundance of bacterial groups in high and low IP infants.  
730 **(A)** cumulative abundance between phase II/III subjects (6-24 months of age) and  
731 phase I infants (within first two weeks of life) with high and low IP; **(B)** Cumulative  
732 abundance at different study day at day 1, 8, and 15 for phase I infants with high and  
733 low IP. The most outstanding difference between high and low IP in preterm infants is in  
734 the *Clostridiales* (p-value = 0.01), which is the most abundant bacterial group in phase  
735 II/III infants.

736

737 **Figure 3.** Comparison of samples with different intestinal permeability on the relative  
738 abundance of members of *Clostridiales*. Bars represent the relative abundance of  
739 *Clostridiales* in each sample. Dotted line represents mean, solid line represents median  
740 relative abundance. The alpha value for the non-parametric factorial Kruskal-Wallis  
741 sum-rank test was 0.05 and the threshold for the logarithmic LDA model (3) score for  
742 discriminative features was set at 2.0. Low IP: La/Rh < 0.05; high IP: La/Rh >= 0.05.

743

744 **Figure 4.** Bacterial species transcriptional activity in preterm infant stools. Fecal  
745 samples are represented in columns and taxonomic composition quantified using  
746 MetaPhlAn (55) version 2 are shown in rows, both are organized by hierarchical  
747 clustering. Normalization using Witten-Bell smoothing was performed, and the relative  
748 expression of a gene in a sample was calculated by normalizing the smoothed value of  
749 the expression level in the metatranscriptome by the smoothed value of the  
750 corresponding gene abundance in the metagenome (56, 57). Color scheme indicates an  
751 approximate measure of the species' clade-specific transcriptional activity (56). The  
752 colored branches show the clustering of bacterial species that are consistently  
753 transcriptionally active (yellow) or consistently transcriptionally inactive (blue) across  
754 samples.

755

756 **Table 1.** Characteristics of Study Subjects (preterm infants <33 weeks gestational age)  
757 (n=38).

**Category**

Intestinal Permeability

OTU Richness

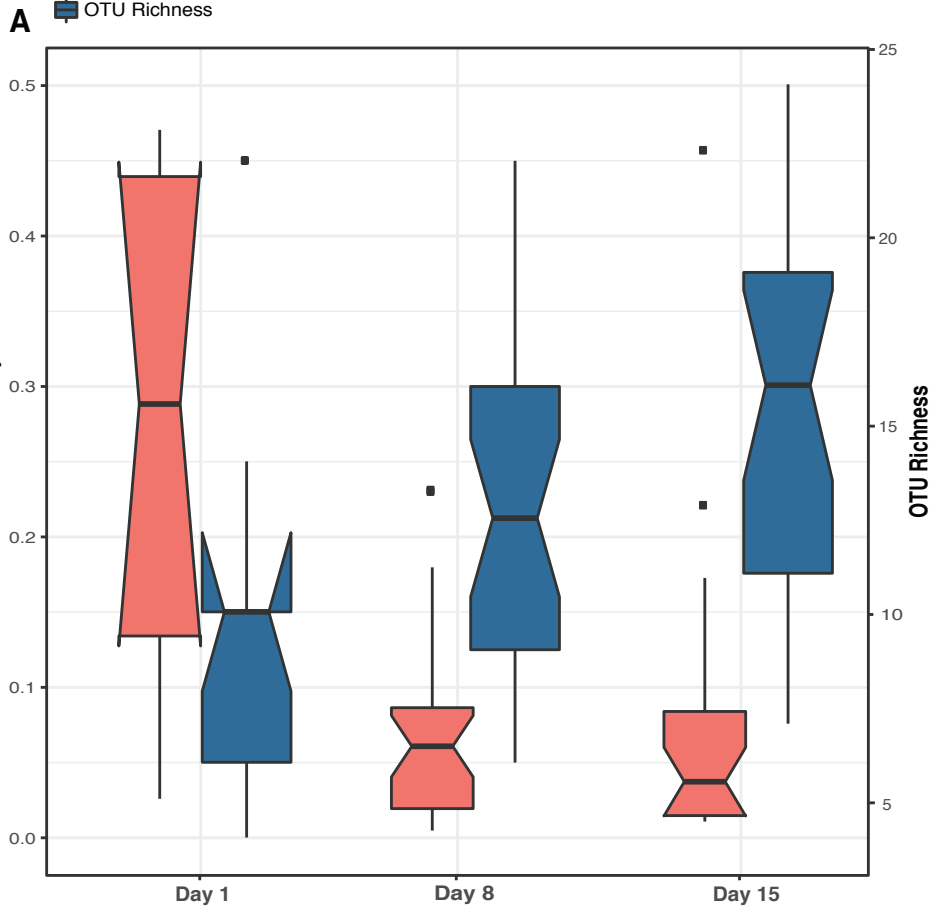**Intestinal Permeability**high ( $La/Rh > 0.05$ )low ( $La/Rh \leq 0.05$ )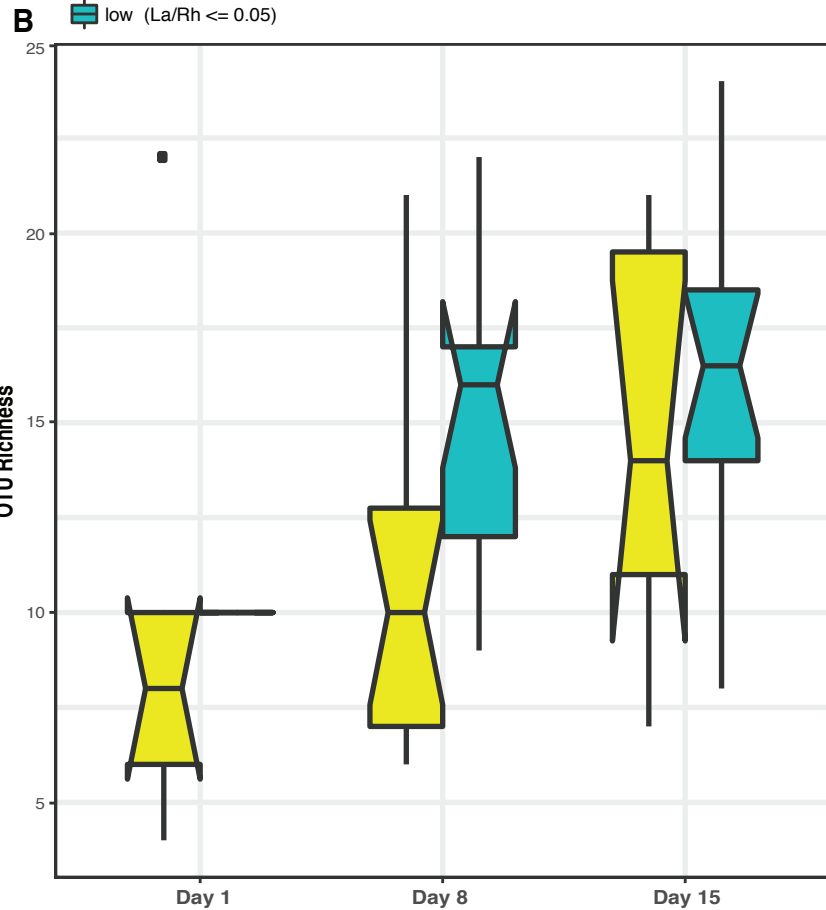

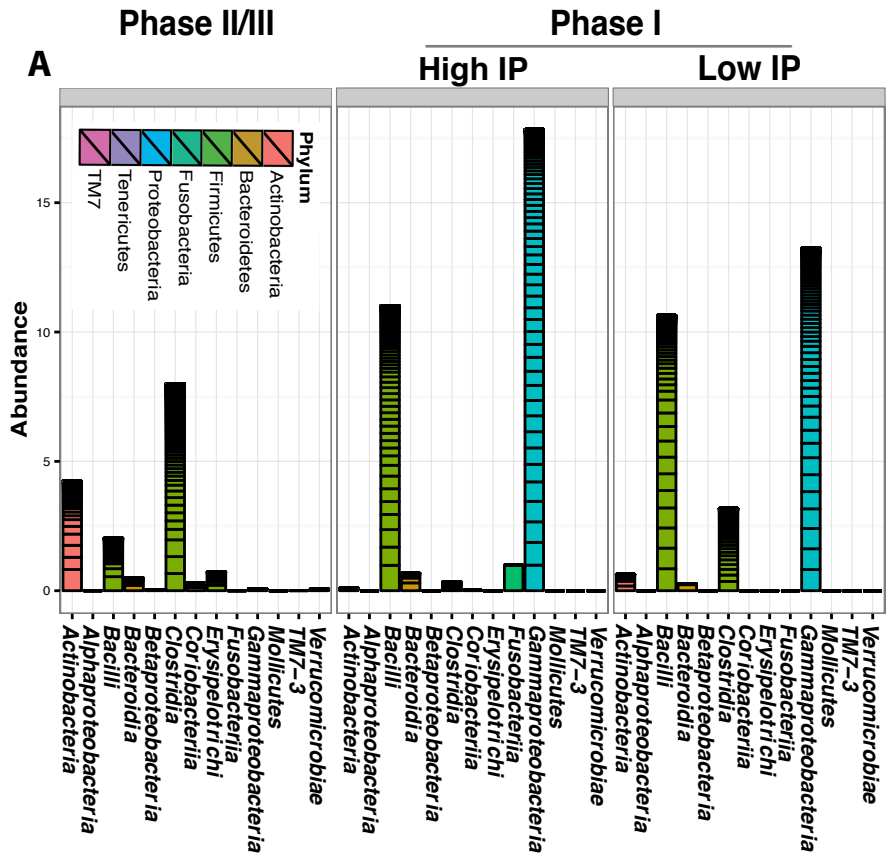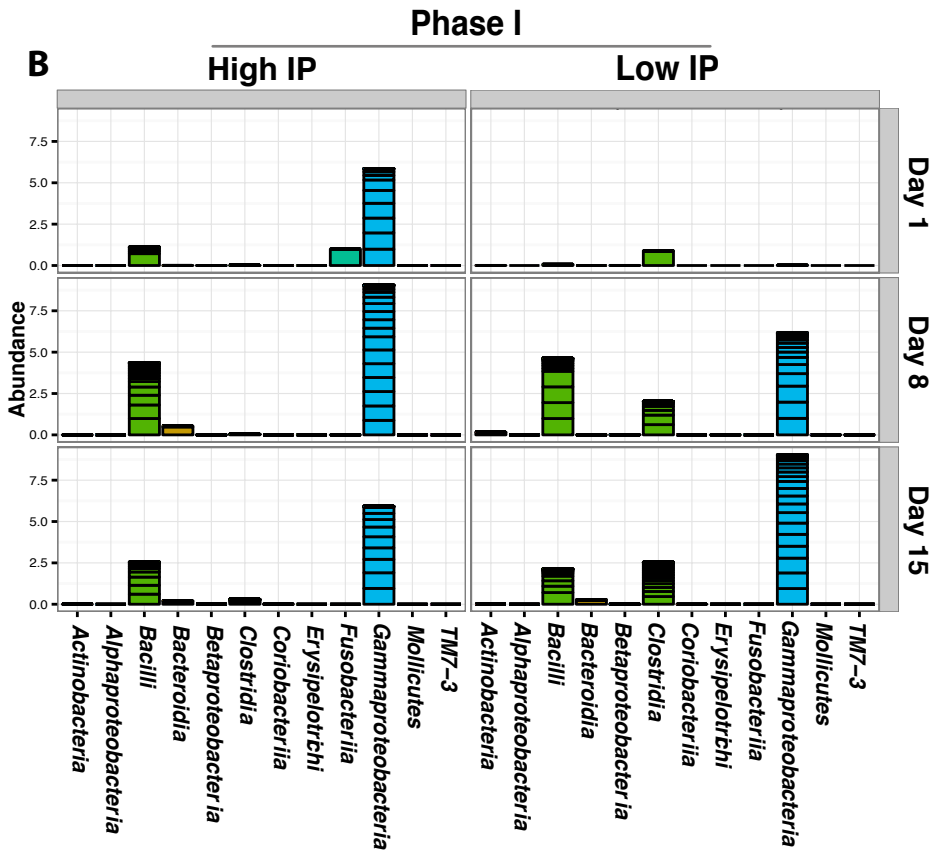



Color Key  
and Histogram

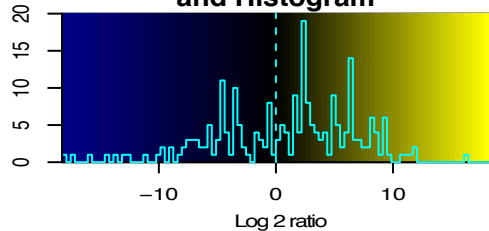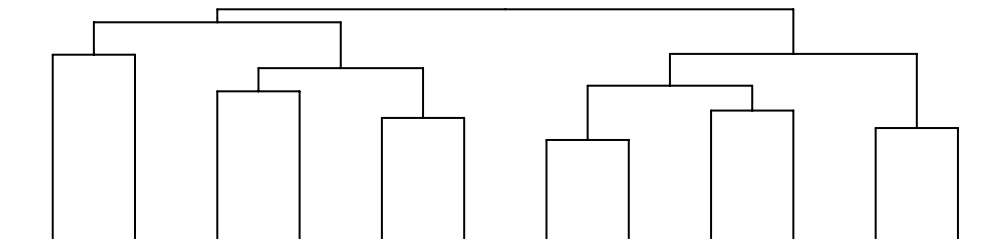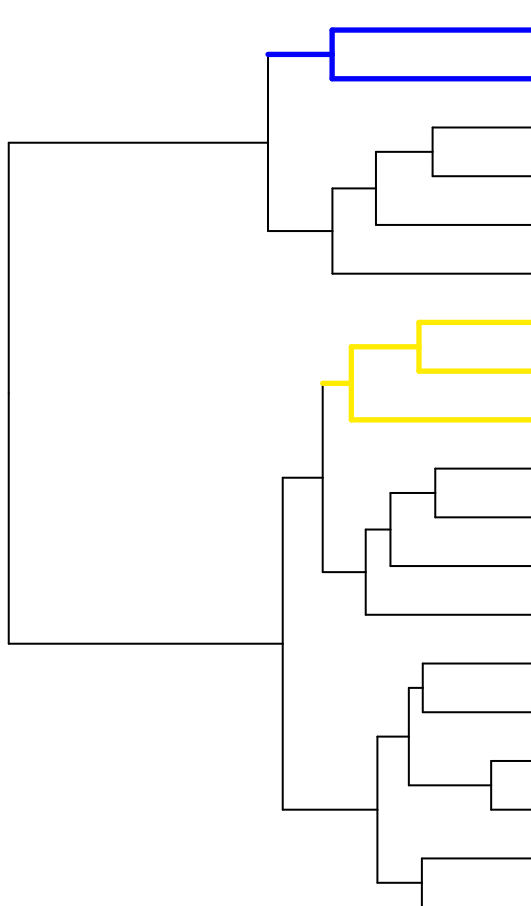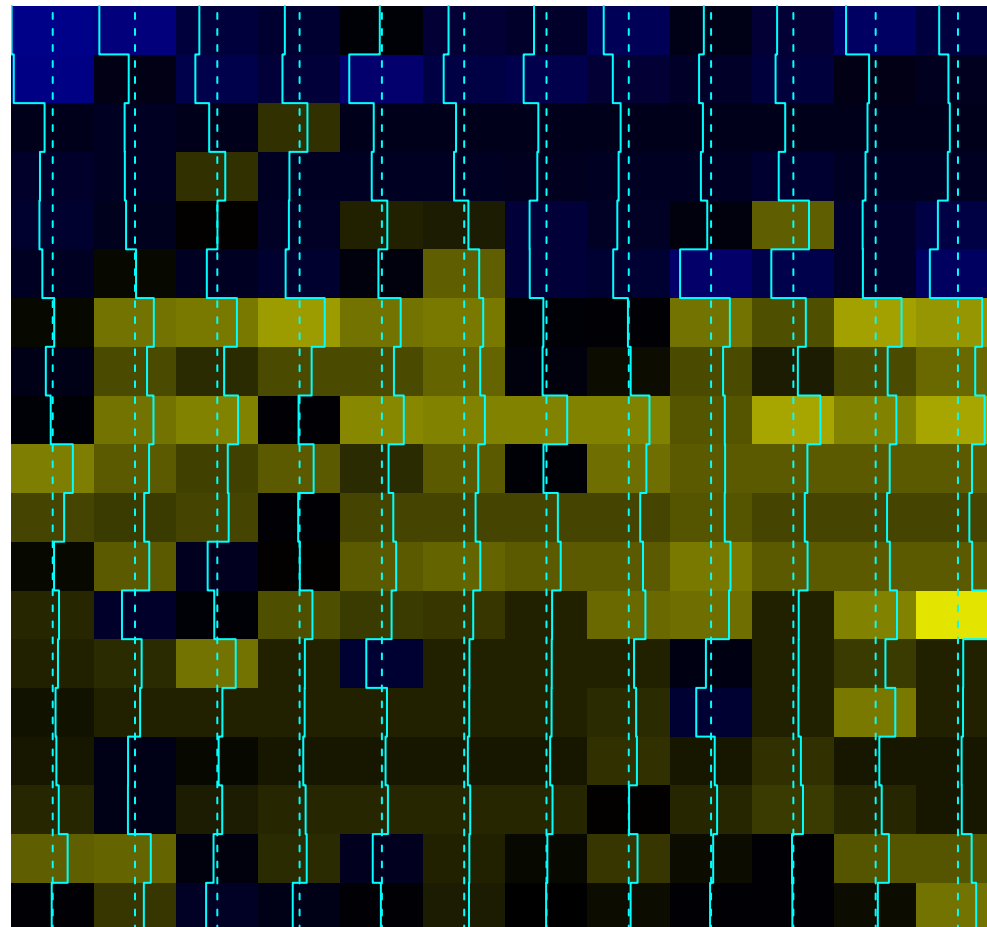

- s\_Klebsiella\_pneumoniae*
- s\_Escherichia\_coli*
- s\_Veillonella\_dispar*
- s\_Bacteroides\_vulgatus*
- s\_Enterococcus\_faecalis*
- s\_Staphylococcus\_epidermidis*
- s\_Bifidobacterium\_breve*
- g\_Clostridiales\_Family\_XI\_Incertae\_Sedis*
- s\_Veillonella\_unclassified*
- s\_Staphylococcus\_lugdunensis*
- s\_Shigella\_sonnei*
- s\_Veillonella\_parvula*
- s\_Klebsiella\_unclassified*
- s\_Streptococcus\_thermophilus*
- s\_Finegoldia\_magna*
- s\_Streptococcus\_vestibularis*
- s\_Streptococcus\_salivarius*
- s\_Propionibacterium\_acnes*
- s\_Clostridium\_perfringens*

**Table 1. Characteristics of Study Subjects (preterm infants <33 weeks gestational age) (n=38).**

|                                            | N  | %                        |
|--------------------------------------------|----|--------------------------|
| <b>Ethnicity</b>                           |    |                          |
| African American                           | 22 | 57.9                     |
| Asian                                      | 3  | 7.9                      |
| White                                      | 12 | 31.6                     |
| Others                                     | 1  | 2.6                      |
| <b>Gender</b>                              |    |                          |
| Female                                     | 17 | 44.7                     |
| Male                                       | 21 | 55.3                     |
| <b>Delivery route</b>                      |    |                          |
| Cesarean                                   | 26 | 68.4                     |
| Vaginal                                    | 12 | 31.6                     |
| <b>Gestational age (Mean, Median, SD)</b>  |    | <b>(29.9, 31, 2.2)</b>   |
| <= 28 weeks                                | 10 | 26.3                     |
| > 28 weeks                                 | 28 | 73.7                     |
| <b>Birth weight (Mean, Median, SD)</b>     |    | <b>(1386, 1472, 404)</b> |
| < 1500 grams                               | 21 | 55.3                     |
| >= 1500 grams                              | 17 | 44.7                     |
| <b>Antibiotic use</b>                      |    |                          |
| None                                       | 7  | 18.4                     |
| 1 to 3 days                                | 12 | 31.6                     |
| > 4 days                                   | 19 | 50.0                     |
| <b>Day start breastmilk feeding</b>        |    |                          |
| Day 1                                      | 17 | 44.7                     |
| Day 2 or 3                                 | 15 | 39.5                     |
| > Day 4                                    | 6  | 15.8                     |
| <b>Day reached full breastmilk feeding</b> |    |                          |
| < Day 7                                    | 5  | 13.2                     |
| Day 8 to 14                                | 15 | 39.5                     |
| > Day 15                                   | 18 | 47.4                     |
| <b>Intestinal permeability pattern</b>     |    |                          |
| normal                                     | 24 | 63.2                     |
| late increase                              | 6  | 15.8                     |
| delayed                                    | 4  | 10.5                     |
